# Supplementary material
Source: Springer Nature journal article supplement (https://www.springerprofessional.de/resource/supplementary/13638_2011_347_MOESM7_ESM.pdf/11897654)
Supplement: MOESM7 [file 11897654]

### Performance vs RS number and budget

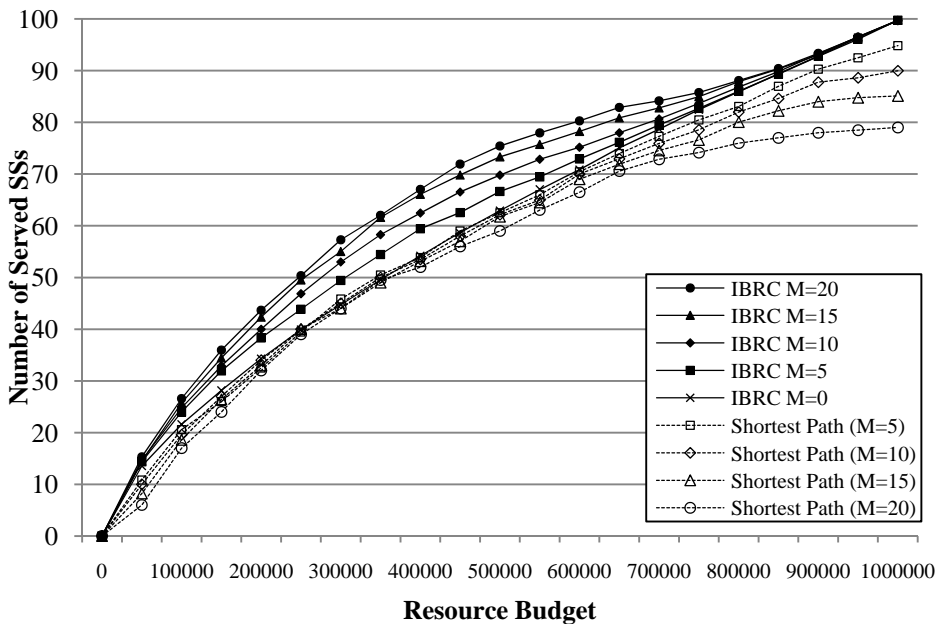

(a) Performance

### Performance Ratio vs Bandwidth Budget

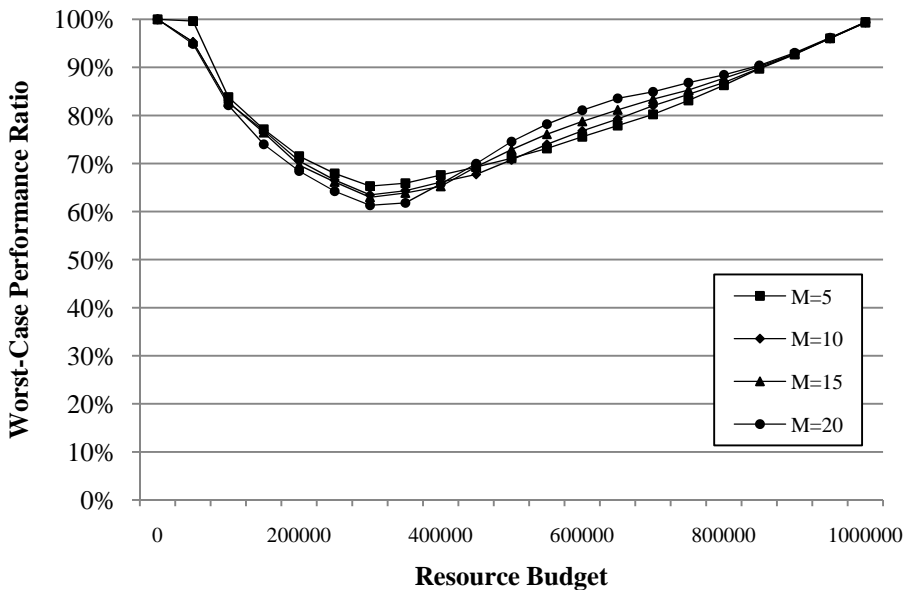

(b) Performance Ratio
